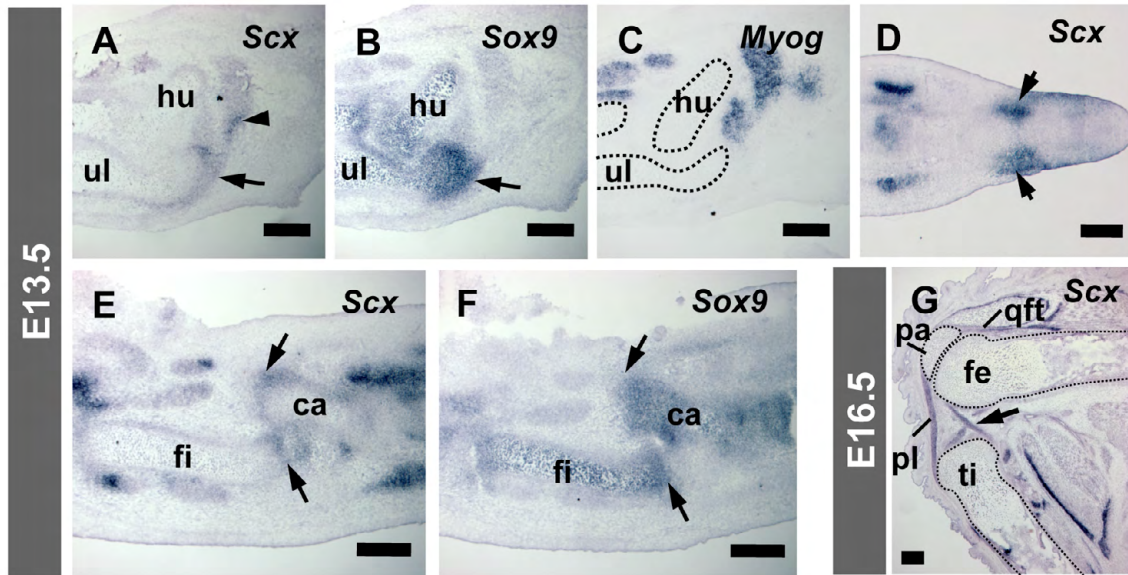

**Fig. S1. Predominant distribution of  $Scx^+$ / $Sox9^+$  cells around the primordial enthesis, the transitional zone from tendon/ligament to cartilage.** (A-G) *In situ* hybridization of *Scx* (A,D,E,G), *Sox9* (B,F) and *Myog* (C). Frozen sagittal sections were prepared from wild-type embryos at E13.5 (A-F) and E16.5 (G). Expression of *Scx*, *Sox9* or *Myog* is assessed in the forelimb (A-D) and hindlimb (E-G). An arrowhead in A indicates the expression of *Scx* at the myotendinous junction. Arrows in A,B indicate the insertion sites of tendons of triceps brachii muscles into the olecranon. Humerus and ulna are enclosed by the dotted line in C. Arrows in D indicate the  $Scx^+$  ligaments of the digit. Arrows in E,F indicate the  $Scx^+$ / $Sox9^+$  epiphyseal regions. (G) Expression of *Scx* in the knee joint at E16.5; femur, tibia and patella are enclosed by the dotted line and the arrow indicates the cruciate ligament. ca, calcaneus; fe, femur; fi, fibula; hu, humerus; pa, patella; pl, patella ligament; qft, quadriceps femoris tendon; ti, tibia; ul, ulna. Scale bars: 200  $\mu$ m.

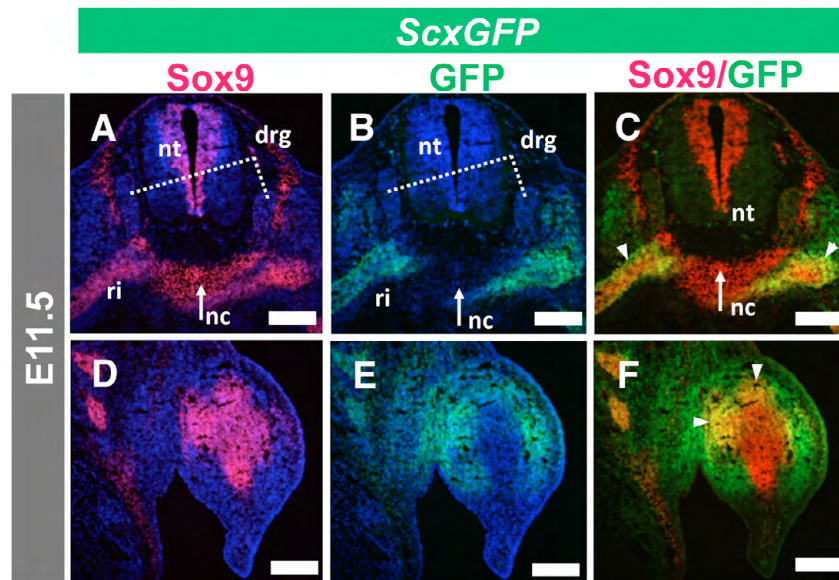

**Fig. S2. Distribution of  $Sox9^+$  and  $Sox9^-$  cells in the  $Scx^+$  region of *ScxGFP* mouse embryos at E11.5.** In *ScxGFP* transgenic mouse embryos,  $Sox9^+$  (red) and  $Scx^+$  cells that are labeled by GFP (green) were detected by double immunostaining with antibodies specific for *Sox9* and GFP, respectively; nuclei were stained with DAPI (blue). Merged images are presented in C,F. Transverse sections at the thoracic level (A-C) and of the forelimb (D-F) of an *ScxGFP* mouse are shown. Arrows in A-C indicate notochord. Arrowheads indicate the  $Scx^+$ / $Sox9^+$  region in the proximal rib (C) and proximal forelimb (F). The dotted line in A,B indicates dorsal root ganglia. drg, dorsal root ganglion; nc, notochord; nt, neural tube; ri, rib. Scale bars: 200  $\mu$ m.

**Table S1. Tendon and ligament nomenclature used in this study**

| No.* | A/F <sup>‡</sup> | Nomenclature of tendons                | No. <sup>§</sup> | Nomenclature of ligaments                        |
|------|------------------|----------------------------------------|------------------|--------------------------------------------------|
| T1   |                  | Thoracolumbar fascia (anterior layer)  | L1               | Facet joint capsule                              |
| T2   | A                | Origin of longissimus muscle           | L2               | Interspinal ligament                             |
| T3   | A                | Origin of latissimus dorsi muscle      | L3               | Collateral ligament of phalangeal joint          |
| T4   |                  | Thoracolumbar fascia                   | L4               | Patella ligament                                 |
| T5   | A                | Origin of longissimus muscle           | L5               | Posterior cruciate ligament                      |
| T6   | A                | Origin of iliocostalis lumborum muscle | L6               | Anterior cruciate ligament                       |
| T7   | A                | Origin of multifidi muscle             | L7               | Transverse ligament of knee                      |
| T8   | F                | Extensor digitorum longus tendon       | L8               | Antebrachial interosseous membrane               |
| T9   | F                | Achilles tendon                        | L9               | Collateral ligament of metacarpophalangeal joint |
| T10  | F                | Superficial digital flexor tendon      |                  |                                                  |
| T11  | A                | Origin of tibialis anterior muscle     |                  |                                                  |
| T12  | F                | Quadriceps femoris tendon              |                  |                                                  |
| T13  | A                | Origin of supinator muscle             |                  |                                                  |
| T14  | A                | Common extensor tendon                 |                  |                                                  |
| T15  | A                | Common extensor tendon                 |                  |                                                  |
| T16  | A                | Origin of supinator muscle             |                  |                                                  |
| T17  | F                | Extensor carpi ulnaris tendon          |                  |                                                  |
| T18  | F                | (a) Extensor digiti quarti tendon      |                  |                                                  |
|      | F                | (b) Extensor digiti quinti tendon      |                  |                                                  |
| T19  | F                | Extensor digitorum communis tendon     |                  |                                                  |
| T20  | A                | Origin of extensor abductor muscle     |                  |                                                  |
| T21  | F                | Extensor carpi radialis brevis tendon  |                  |                                                  |
| T22  | F                | Extensor carpi radialis longus tendon  |                  |                                                  |
| T23  | F                | Abductor pollicis tendon               |                  |                                                  |
| T24  | F                | Flexor carpi radialis tendon           |                  |                                                  |
| T25  | F                | Extensor indicis proprius tendon       |                  |                                                  |
| T26  | F                | Flexor digitorum profundus tendon      |                  |                                                  |
| T27  | F                | Flexor digitorum sublimis tendon       |                  |                                                  |
| T28  | F                | Palmaris longus tendon                 |                  |                                                  |
| T29  | F                | Flexor carpi ulnaris tendon            |                  |                                                  |
| T30  | F                | Interosseous                           |                  |                                                  |

\*T1-T30 indicate tendons.

<sup>‡</sup>A or F indicates anchoring or force-transmitting tendons.

<sup>§</sup>L1-L9 indicate ligaments.
